# Supplementary material
Source: Springer Nature journal article supplement (https://www.springermedizin.de/resource/supplementary/12985_2014_2396_MOESM3_ESM.pdf/9607022)

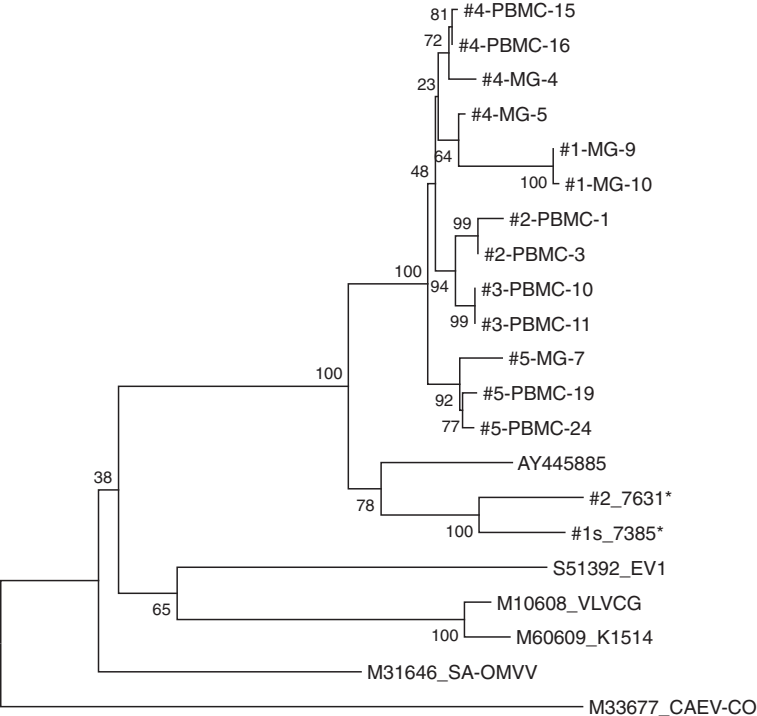

0.05

Supplement: MOESM3 [file 9607022]
